# Supplementary material for: Reflections Based on Pollution Changes Brought by COVID-19 Lockdown in Shanghai
Source: MDPI journal article supplement (doi:10.3390/ijerph182010613), 2021-10-10

## Supplimentary materials

**SFig.1** NMDS analysis of different pollutants before and during lockdown period

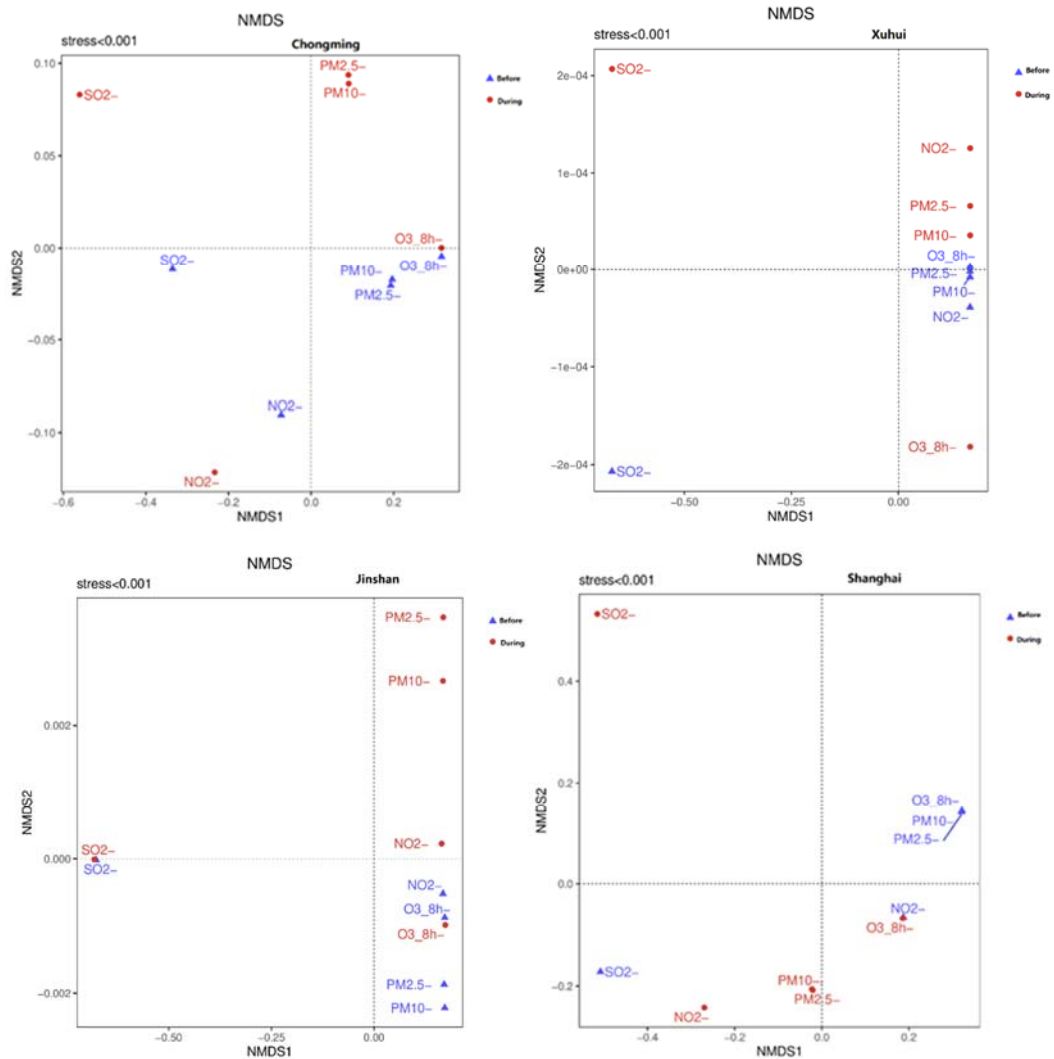

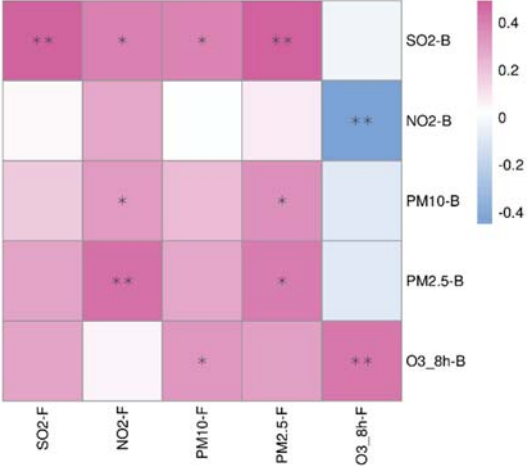

SFig 2 . Clustering analysis of different pollutants before (F) and during lockdown (B)  
in differernt functional parts of Shanghai

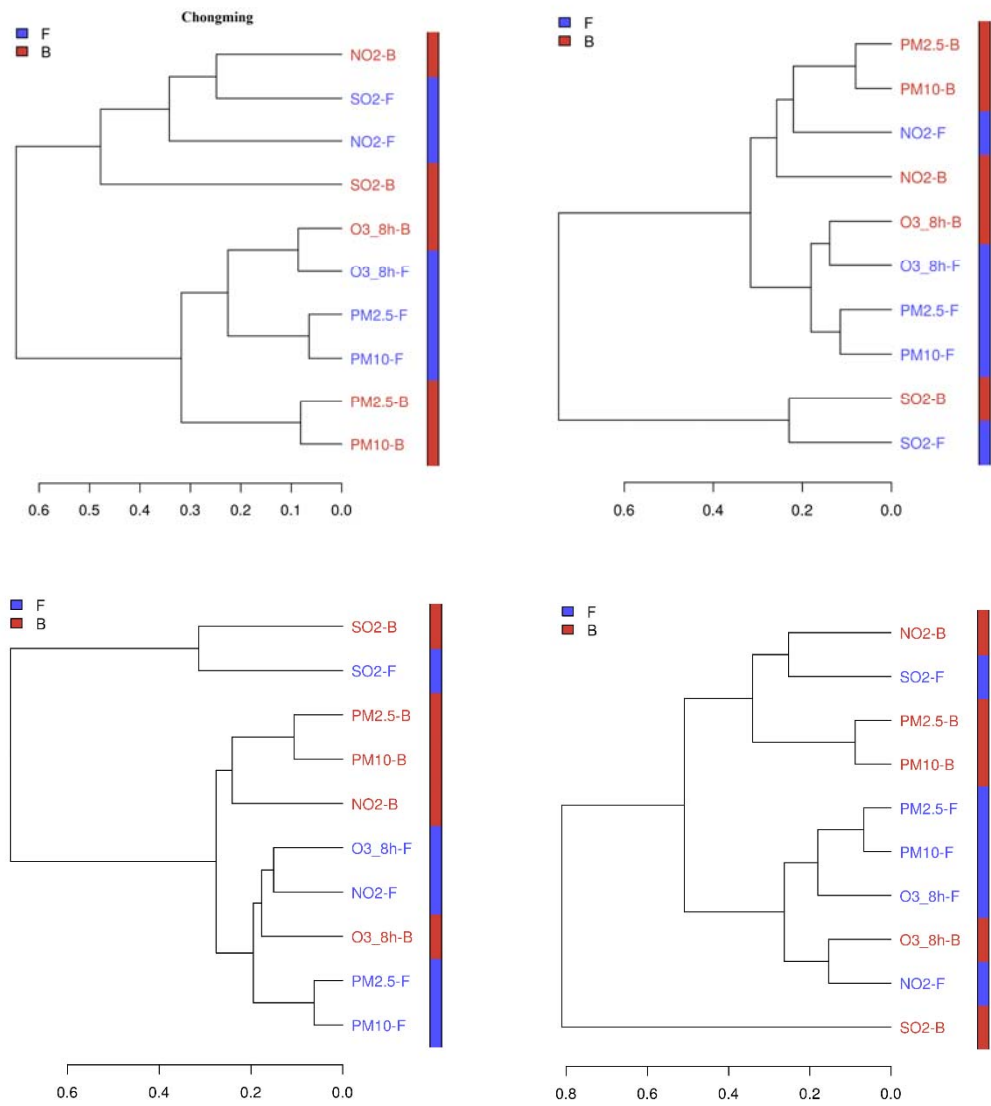

Supplement: s1 [file s1]
